# Supplementary material for: Alveolar macrophage-expressed Plet1 is a driver of lung epithelial repair after viral pneumonia
Source: PubMed Central journal article supplement (PMC10761876; doi:10.1038/s41467-023-44421-6), 2024-01-02
Supplement: 41467_2023_44421_MOESM3_ESM.pdf [file 41467_2023_44421_MOESM3_ESM.pdf]

## **Description of Additional Supplementary Files**

File Name: Supplementary Data 1

Description: Antibody List

File Name: Supplementary Data 2

Description: Primer List
